# Supplementary material for: Rapid Response System Improves Sepsis Bundle Compliances and Survival in Hospital Wards for 10 Years
Source: MDPI journal article supplement (doi:10.3390/jcm10184244), 2021-09-18
Supplement: s1 [file s1]

**Table S2.** Clinical characteristics of the 976 patients

| Variables                         | All<br>( <i>n</i> = 976) | Complete<br>Bundle<br>( <i>n</i> = 569) | Incomplete<br>Bundle<br>( <i>n</i> = 407) | <i>p</i> -Value |
|-----------------------------------|--------------------------|-----------------------------------------|-------------------------------------------|-----------------|
| Age, years, mean (SD)             | 61.5 ± 13.5              | 61.9 ± 13.1                             | 60.9 ± 14.0                               | 0.284           |
| Male, <i>n</i> (%)                | 594 (60.9)               | 349 (61.3)                              | 245 (60.2)                                | 0.384           |
| SOFA score, mean (SD)             | 10.8 ± 3.5               | 10.6 ± 3.3                              | 11.1 ± 3.7                                | 0.029           |
| Co-morbidity, <i>n</i> (%)        |                          |                                         |                                           |                 |
| Solid tumor                       | 421 (43.1)               | 255 (44.8)                              | 166 (40.8)                                | 0.117           |
| Hematologic malignancy            | 299 (30.6)               | 176 (30.9)                              | 123 (30.2)                                | 0.434           |
| Chronic lung disease              | 51 (5.2)                 | 27 (4.7)                                | 24 (5.9)                                  | 0.256           |
| Chronic heart disease             | 168 (17.2)               | 100 (17.6)                              | 68 (16.7)                                 | 0.396           |
| Chronic liver disease             | 152 (15.6)               | 88 (15.5)                               | 64 (15.7)                                 | 0.490           |
| Chronic renal disease             | 64 (6.6)                 | 34 (6.0)                                | 30 (7.4)                                  | 0.230           |
| DM                                | 277 (28.4)               | 173 (30.4)                              | 104 (25.6)                                | 0.056           |
| Department, <i>n</i> (%)          |                          |                                         |                                           |                 |
| Medical                           | 876 (89.8)               | 509 (89.5)                              | 367 (90.2)                                | 0.595           |
| Surgical                          | 97 (9.9)                 | 59 (10.4)                               | 38 (9.3)                                  |                 |
| Maternal                          | 3 (0.3)                  | 1 (0.2)                                 | 2 (0.2)                                   |                 |
| Type of activation, <i>n</i> (%)  |                          |                                         |                                           |                 |
| Screening                         | 561 (57.5)               | 342 (60.1)                              | 219 (53.8)                                | 0.029           |
| Direct call                       | 415 (42.5)               | 227 (39.9)                              | 188 (46.2)                                |                 |
| Source of infection, <i>n</i> (%) |                          |                                         |                                           |                 |
| Intra-abdominal                   | 434 (44.5)               | 275 (48.3)                              | 159 (39.1)                                | 0.037           |
| Pneumonia                         | 261 (26.7)               | 131 (23.0)                              | 130 (31.9)                                |                 |
| Bacteremia                        | 134 (13.7)               | 77 (13.5)                               | 57 (14.0)                                 |                 |
| Urinary tract infection           | 58 (5.9)                 | 35 (6.2)                                | 23 (5.7)                                  |                 |
| Other                             | 64 (6.6)                 | 37 (6.5)                                | 27 (6.6)                                  |                 |
| Unknown                           | 25 (2.6)                 | 14 (2.5)                                | 11 (2.7)                                  |                 |
| Blood culture, <i>n</i> (%)       |                          |                                         |                                           |                 |
| Positive; Gram-positive           | 79 (8.7)                 | 44 (7.8)                                | 35 (10.3)                                 | 0.003           |
| Positive; Gram-negative           | 317 (35.1)               | 223 (39.7)                              | 94 (27.6)                                 |                 |
| Positive; Poly-microbial          | 65 (7.2)                 | 43 (7.7)                                | 22 (6.5)                                  |                 |
| Positive; Fungus                  | 13 (1.4)                 | 7 (1.2)                                 | 6 (1.8)                                   |                 |
| Negative                          | 429 (47.5)               | 245 (43.6)                              | 184 (54.0)                                |                 |
| Laboratory findings, mean (SD)    |                          |                                         |                                           |                 |
| Platelets, X10 <sup>3</sup> /L    | 114.72 ± 109.92          | 116.80 ± 112.65                         | 119.72 ± 116.44                           | 0.495           |

|                                     |               |               |               |       |
|-------------------------------------|---------------|---------------|---------------|-------|
| C-reactive protein, mg/L            | 11.38 ± 8.80  | 12.20 ± 9.52  | 13.38 ± 10.37 | 0.002 |
| Procalcitonin, ng/mL                | 33.20 ± 70.01 | 30.28 ± 63.83 | 25.20 ± 51.05 | 0.068 |
| Creatinine, mg/dL                   | 1.57 ± 1.09   | 1.68 ± 1.32   | 1.85 ± 1.59   | 0.002 |
| Bilirubin, mg/dL                    | 4.01 ± 6.64   | 4.12 ± 6.74   | 4.29 ± 6.89   | 0.523 |
| Lactate (time zero), mmol/L         | 5.25 ± 3.00   | 5.12 ± 3.06   | 4.92 ± 3.14   | 0.102 |
| Lactate (re-measurement),<br>mmol/L | 4.74 ± 3.04   | 4.78 ± 3.19   | 4.94 ± 3.50   | 0.340 |

---

Data are presented as *n* (%) and mean ± SD. SOFA, sequential (sepsis-related) organ failure assessment.
