# Supplementary material for: Rapid Response System Improves Sepsis Bundle Compliances and Survival in Hospital Wards for 10 Years
Source: MDPI journal article supplement (doi:10.3390/jcm10184244), 2021-09-18
Supplement: s1 [file s1]

**Table S1.** Sepsis bundle compliance and 28-day mortality for patients with septic shock over 10 years

| Variables                                               | All<br>( <i>n</i> = 976) | 2008<br>( <i>n</i> = 34) | 2009<br>( <i>n</i> = 65) | 2010<br>( <i>n</i> = 113) | 2011<br>( <i>n</i> = 91) | 2012<br>( <i>n</i> = 106) | 2013<br>( <i>n</i> = 95) | 2014<br>( <i>n</i> = 101) | 2015<br>( <i>n</i> = 121) | 2016<br>( <i>n</i> = 110) | 2017<br>( <i>n</i> = 140) | <i>p</i> -<br>Value |
|---------------------------------------------------------|--------------------------|--------------------------|--------------------------|---------------------------|--------------------------|---------------------------|--------------------------|---------------------------|---------------------------|---------------------------|---------------------------|---------------------|
| Measurement of lactate/3hour                            | 939 (96.2)               | 33 (97.1)                | 57 (87.7)                | 99 (87.6)                 | 88 (96.7)                | 104 (98.1)                | 94 (98.9)                | 101 (100.0)               | 119 (98.3)                | 107 (97.3)                | 137 (97.9)                | <0.001              |
| Obtain blood cultures/3hour                             | 791 (81.0)               | 20 (58.8)                | 43 (66.2)                | 81 (71.7)                 | 73 (80.2)                | 85 (80.2)                 | 77 (81.1)                | 84 (83.2)                 | 107 (88.4)                | 97 (88.2)                 | 124 (88.6)                | <0.001              |
| Administer broad-spectrum intravenous antibiotics/3hour | 940 (96.3)               | 32 (94.1)                | 62 (95.4)                | 104 (92.0)                | 85 (93.4)                | 104 (98.1)                | 91 (95.8)                | 100 (99.0)                | 118 (97.5)                | 107 (97.3)                | 137 (97.9)                | 0.144               |
| Administer 30 mL/kg crystalloid/3hour                   | 885 (90.7)               | 28 (82.4)                | 64 (98.5)                | 101 (89.4)                | 87 (95.6)                | 94 (88.7)                 | 86 (90.5)                | 93 (92.1)                 | 108 (89.3)                | 100 (90.9)                | 124 (88.6)                | 0.210               |
| Application of vasopressors/6hour                       | 976 (100.0)              | 34 (100.0)               | 65 (100.0)               | 113 (100.0)               | 91 (100.0)               | 106 (100.0)               | 95 (100.0)               | 101 (100.0)               | 121 (100.0)               | 110 (100.0)               | 140 (100.0)               |                     |
| Repeat the lactate measurement/6hour                    | 789 (80.8)               | 16 (47.1)                | 39 (60.0)                | 73 (64.6)                 | 72 (79.1)                | 92 (86.8)                 | 86 (90.5)                | 85 (84.2)                 | 102 (84.3)                | 98 (89.1)                 | 126 (90.0)                | <0.001              |
| Complete bundle overall                                 | 569 (58.3)               | 9 (26.5)                 | 26 (40.0)                | 39 (34.5)                 | 49 (53.8)                | 65 (61.3)                 | 61 (64.2)                | 66 (65.3)                 | 81 (66.9)                 | 75 (68.2)                 | 98 (70.0)                 | <0.001              |
| 28-day mortality                                        | 429 (44.0)               | 17 (50.0)                | 30 (46.2)                | 51 (45.1)                 | 49 (53.8)                | 48 (45.3)                 | 44 (46.3)                | 56 (55.4)                 | 47 (38.8)                 | 42 (38.2)                 | 45 (32.1)                 | 0.014               |

Data are presented as *n* (%).
